# Supplementary material
Source: Springer Nature journal article supplement (https://www.springermedizin.de/resource/supplementary/12886_2009_154_MOESM2_ESM.pdf/9474814)
Supplement: MOESM2 [file 9474814]

**A**

NFL

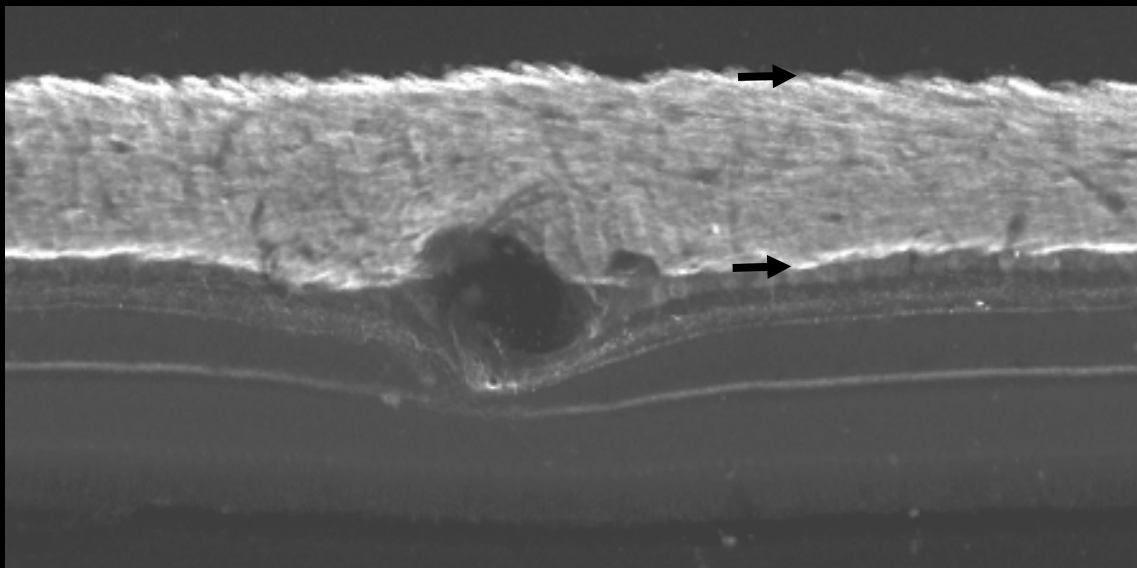

retina

N200 Ab-labeled neurofilaments

**B**

RGC

IPL

INL

OPL

Phot

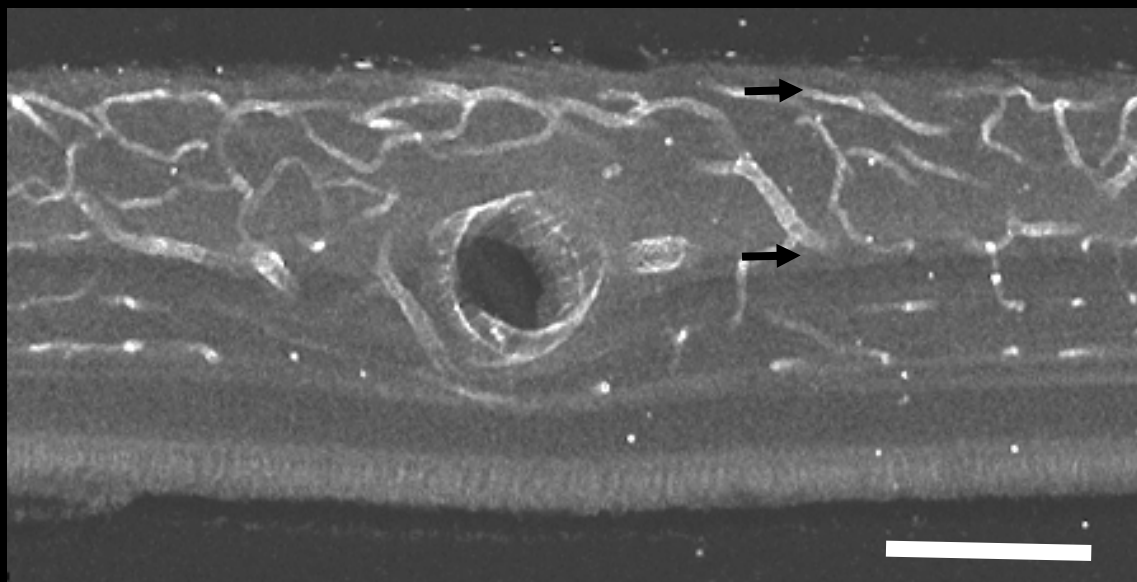

retina

CD31/vWF Ab-labeled vasculature
